# Supplementary material for: FOXC1 is associated with estrogen receptor alpha and affects sensitivity of tamoxifen treatment in breast cancer
Source: PubMed Central journal article supplement (PMC5269562; doi:10.1002/cam4.990), 2016-12-28
Supplement: CAM4-6-275-s001.pdf [file CAM4-6-275-s001.pdf]

# Supplementary Figure 1

## Breast Invasive Carcinoma (TCGA, Nature 2012)

All Tumors( 825 Samples)

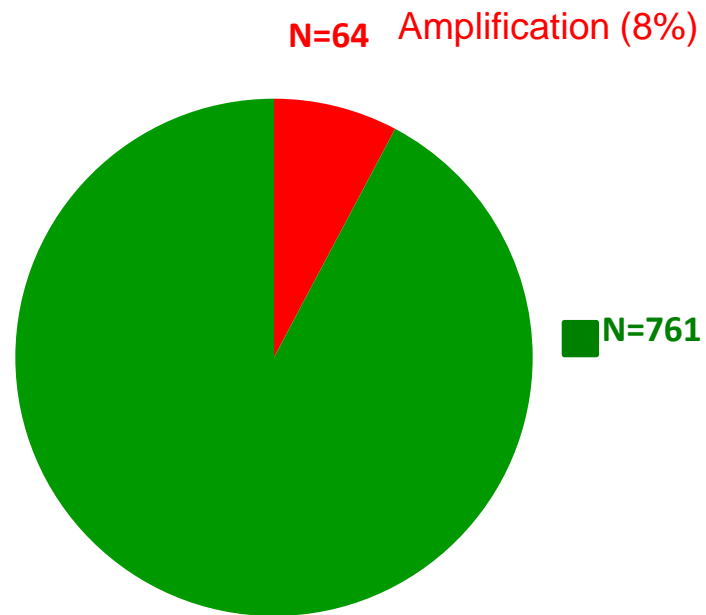

# Supplementary Figure 2

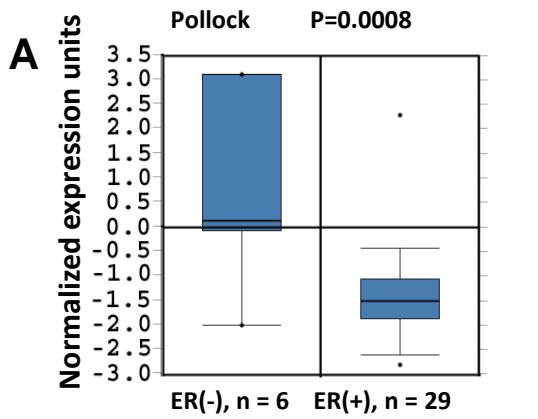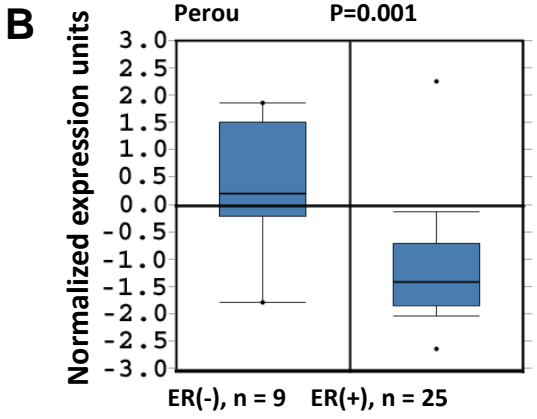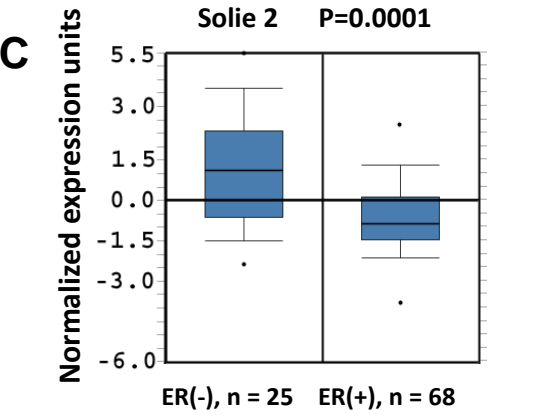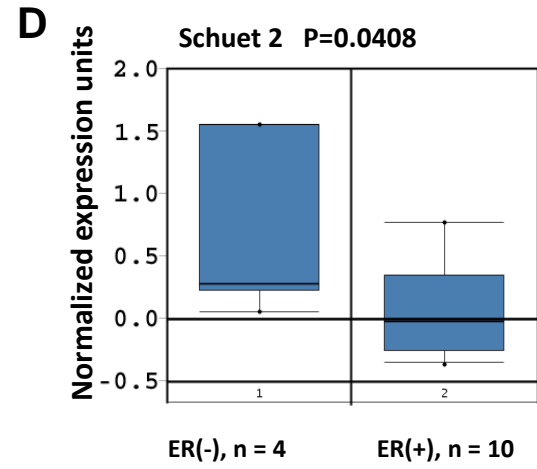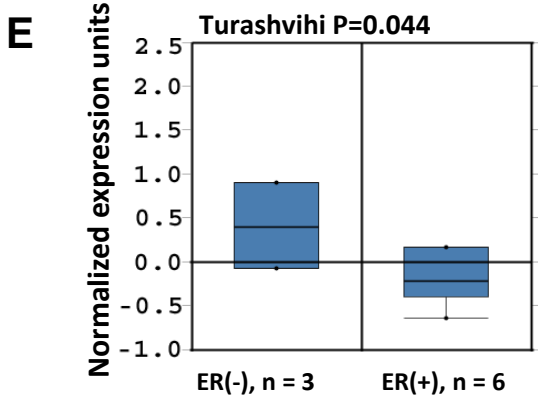

# Supplementary Figure 3

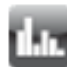

## FOXC1 Expression in TCGA Breast

Grouped by Estrogen Receptor Status

### TCGA Breast Statistics

Reporter:

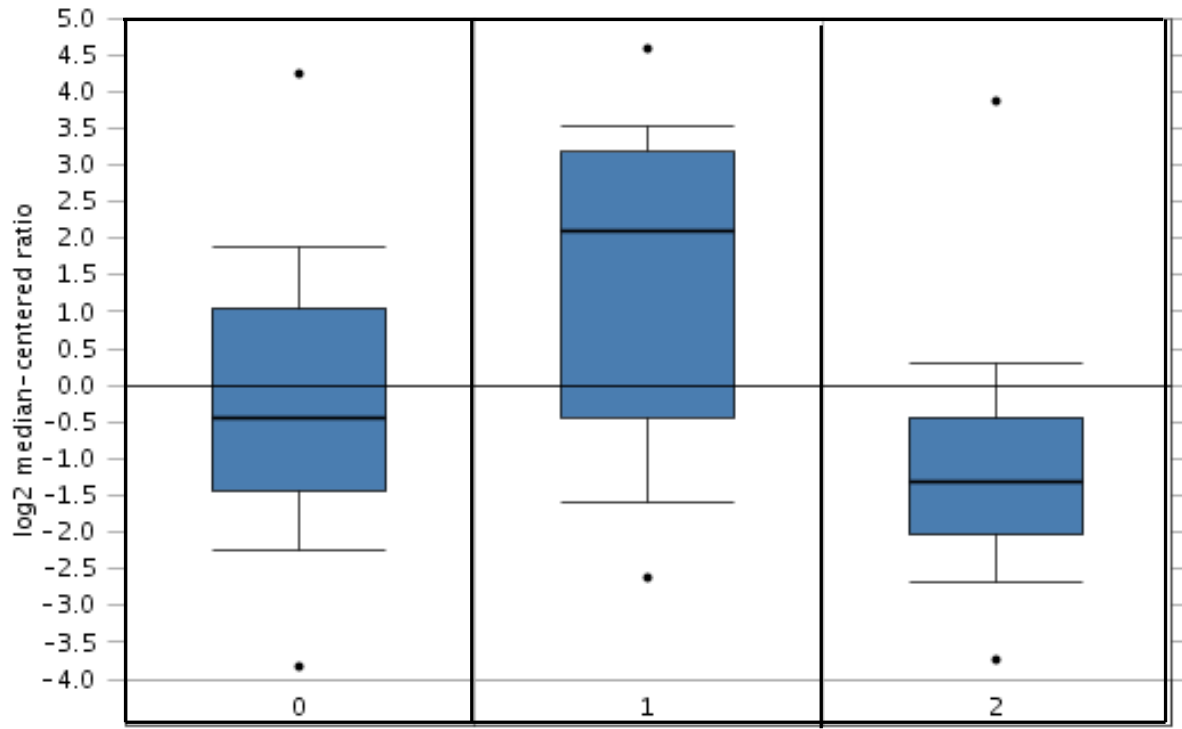

**NO value(N=225)**

**ER-(N=95)**

**ER+(N=273)**

# Supplementary Figure 4

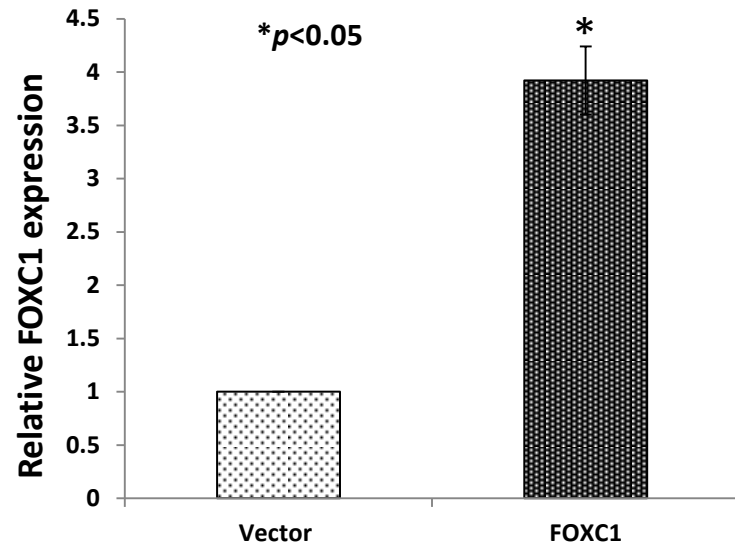

**T47D**

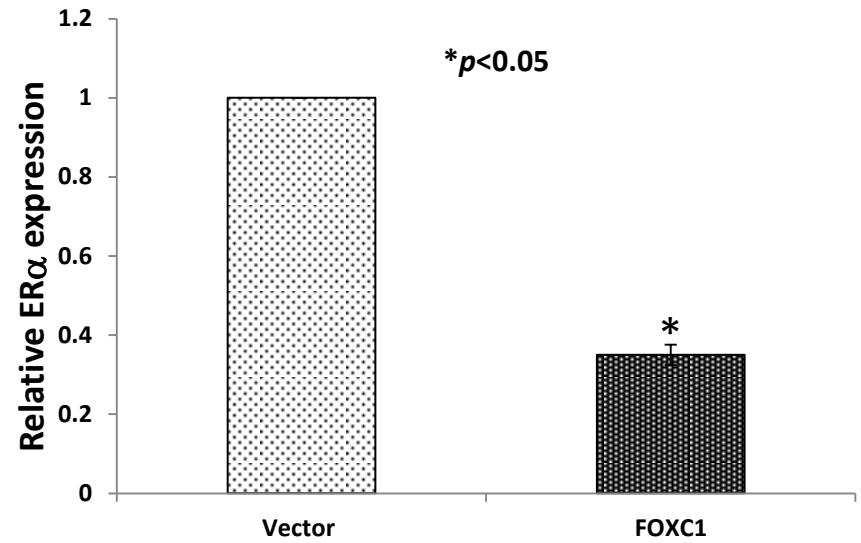

**T47D**

# Supplementary Figure 5

**A**

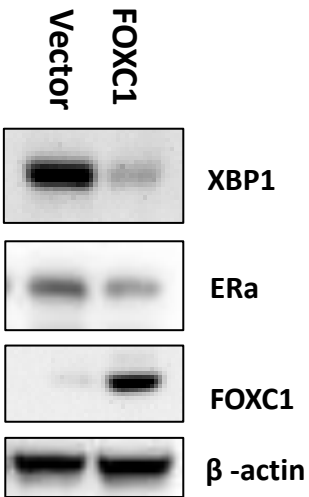

**T47D**

**B**

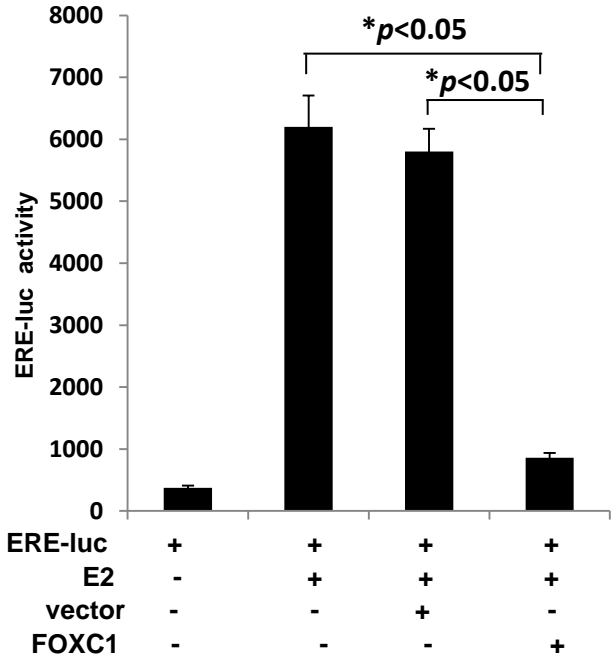

**T47D**

**Supplementary Figure 6**

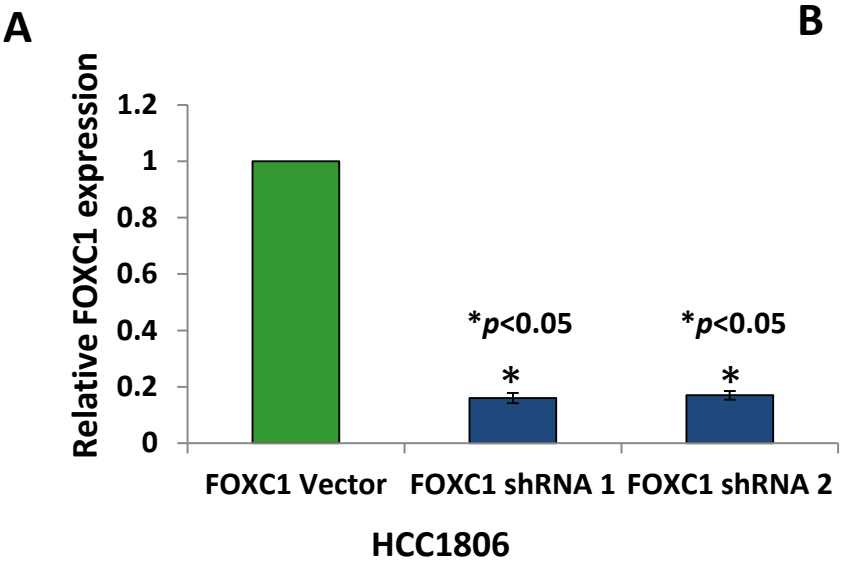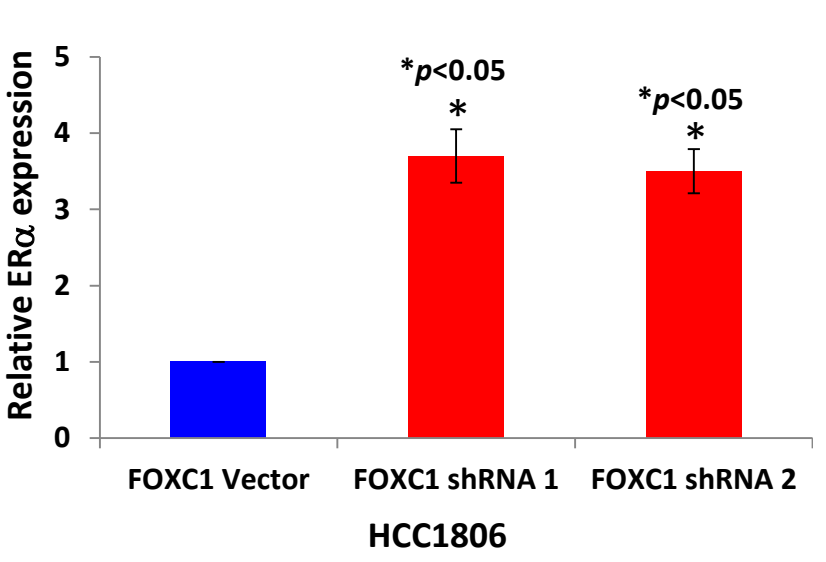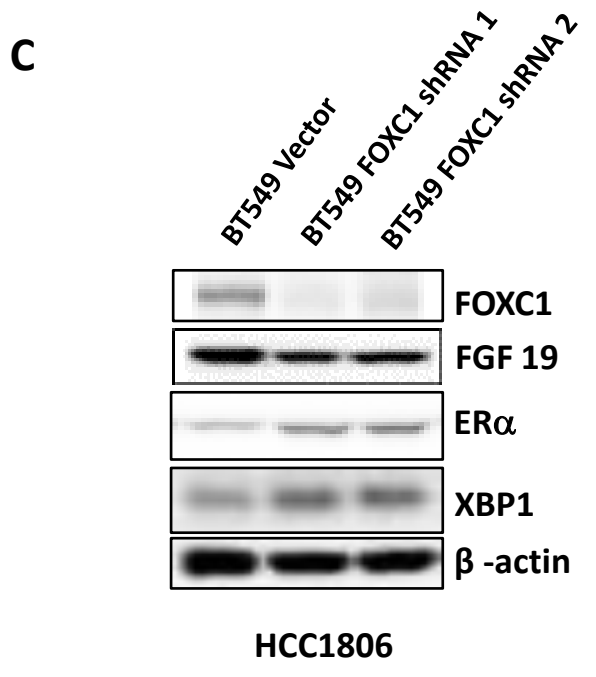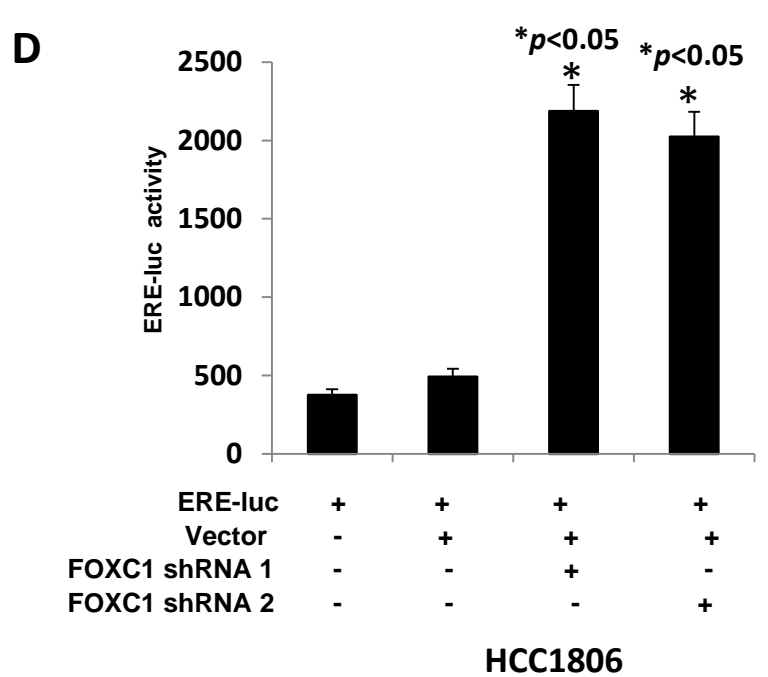

# Supplementary Figure 7

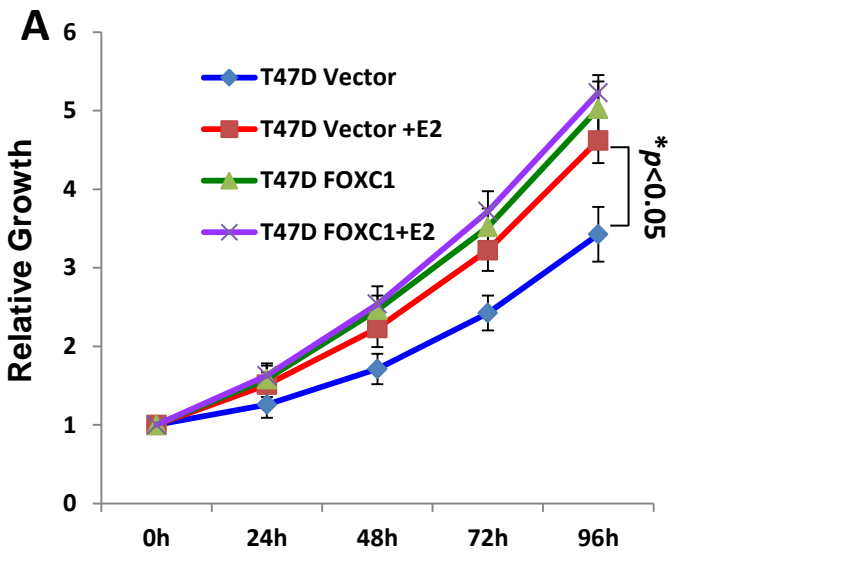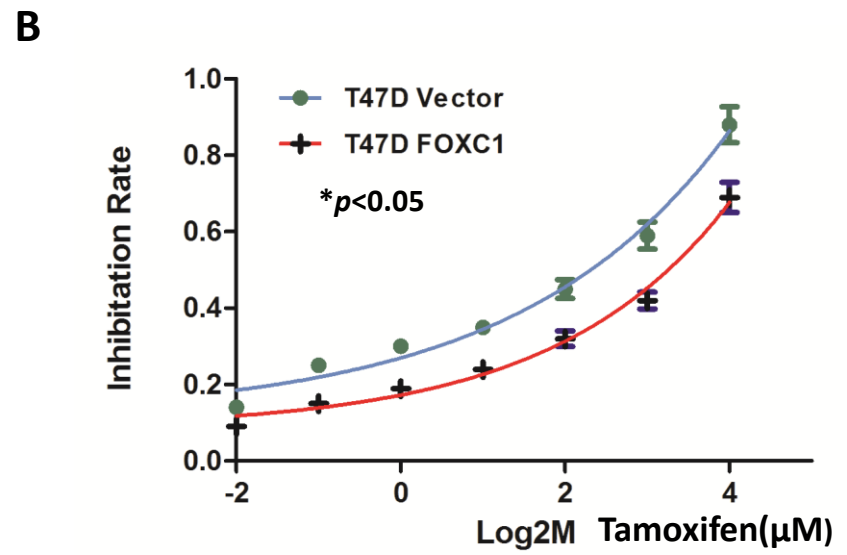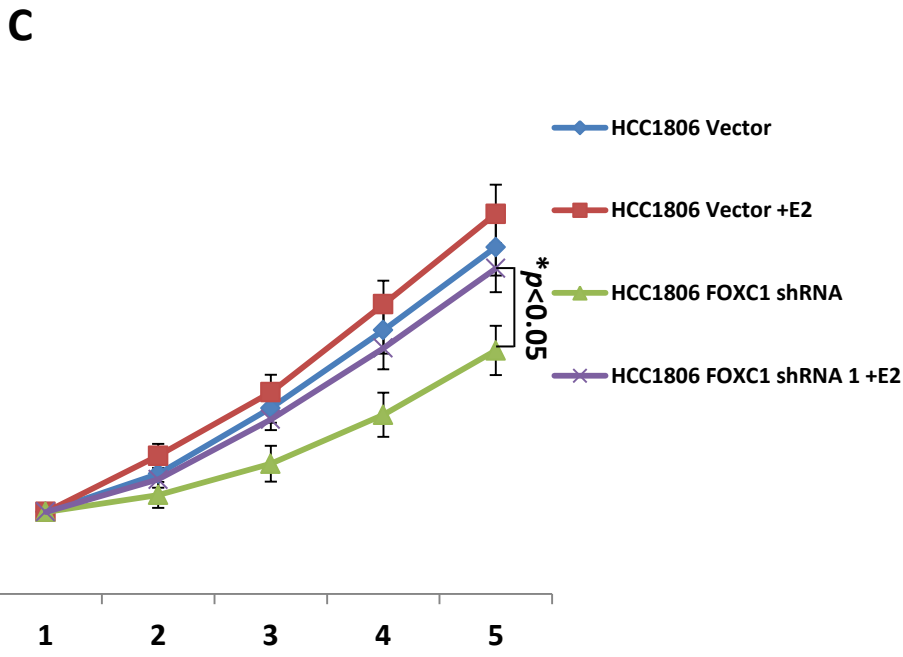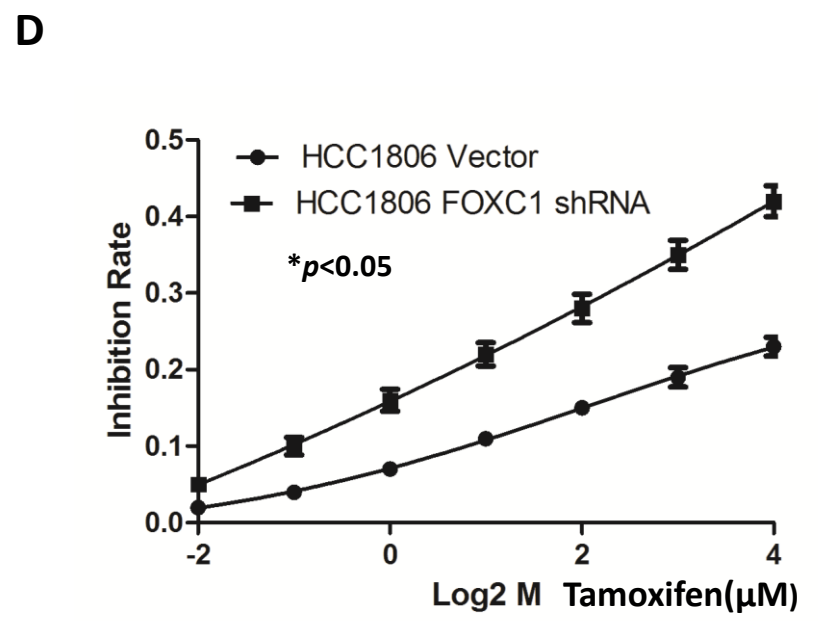

# Neve expression for each cell line: FOXC1

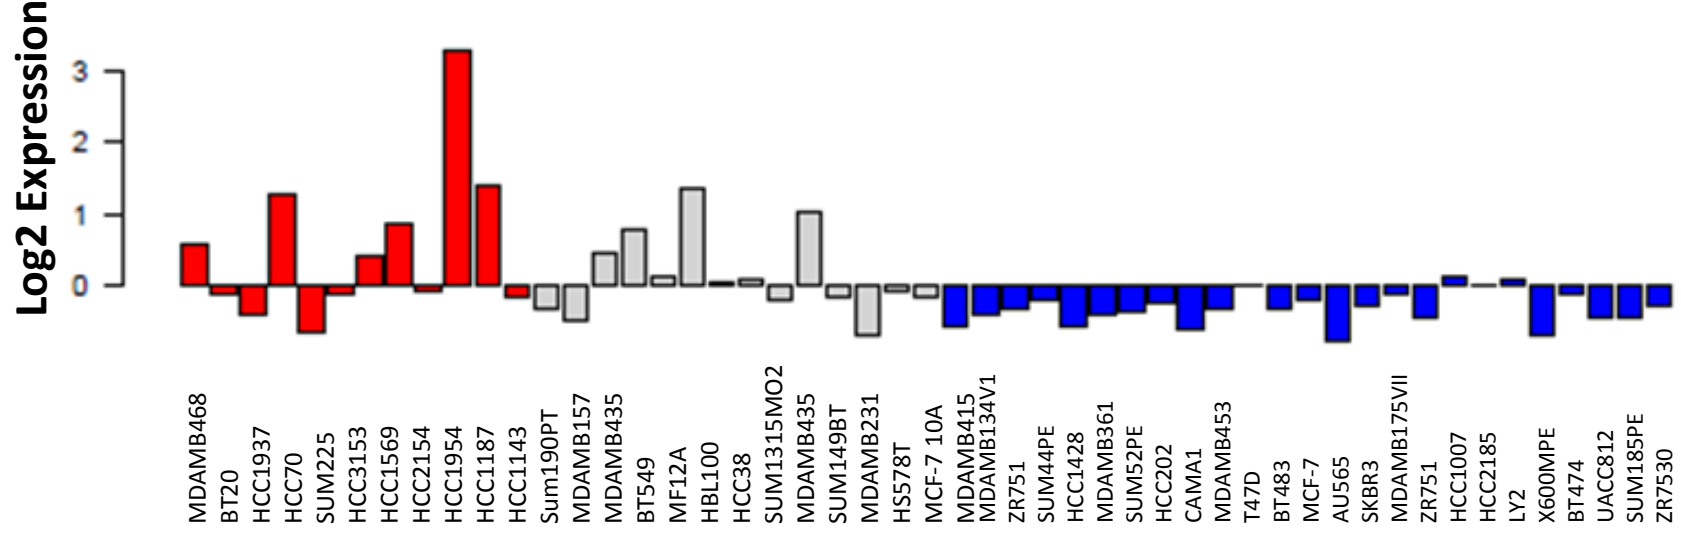



Supplementary Figure 9

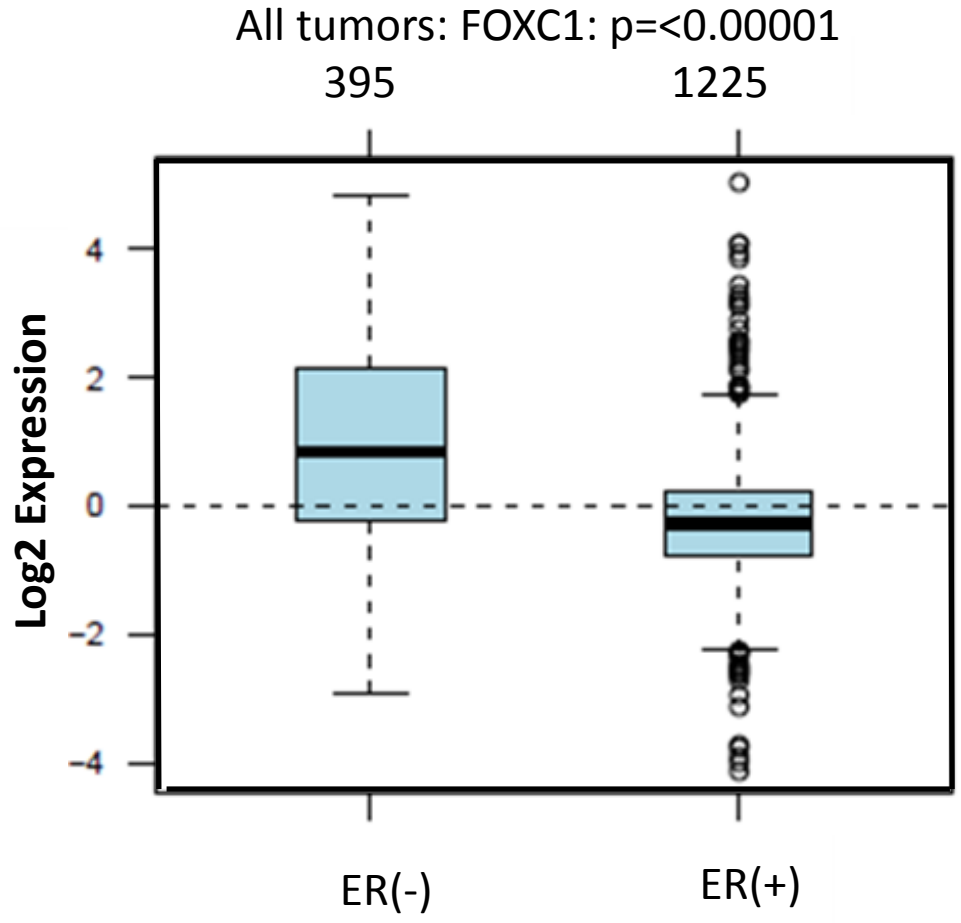

Supplementary Figure 10

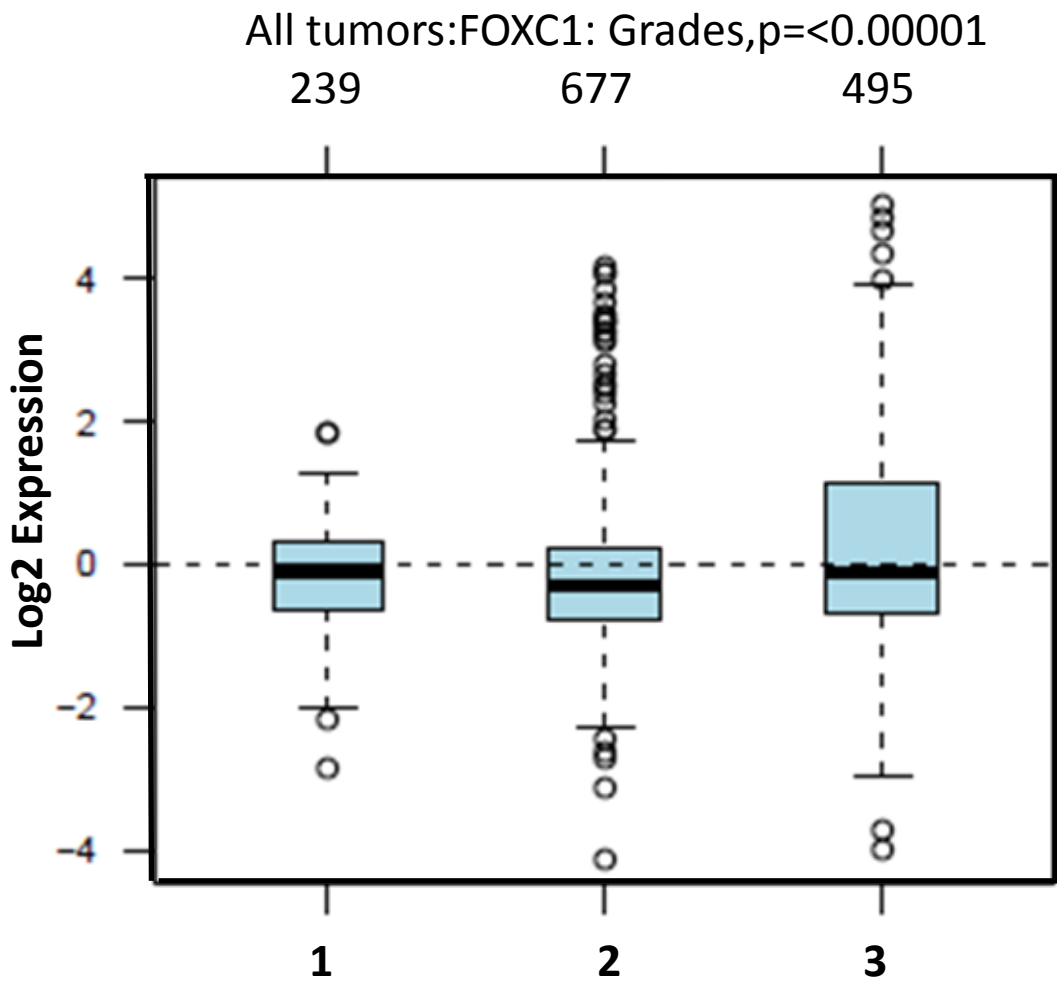

**Supplementary Table 1 Primers for RT-qPCR Assays**

| <b>Biomarker</b>             | <b>Forward</b>                                  | <b>Reverse</b>                     |
|------------------------------|-------------------------------------------------|------------------------------------|
| <b>ER</b>                    | <b>CGG TTA GAT TCA TCA TGC GGA<br/>AC[FAM]G</b> | <b>TGT GTA GAG GGC ATG GTG GAG</b> |
| <b>FOXC1</b>                 | <b>CGG TAT CCA GCC AGT CTC TGT<br/>AC[FAM]G</b> | <b>GTT CGG CTT TGA GGG TGT GTC</b> |
| <b>B2-<br/>microglobulin</b> | <b>TGTCACAGCCCAAGATAG</b>                       | <b>CCAGCAAGCAGAATTTGGAA</b>        |
